# Supplementary material for: Rational design of mixed Sn–Ge based hybrid halide perovskites for optoelectronic applications: a first principles study
Source: Royal Society of Chemistry journal article supplement (doi:10.1039/d2ra05256c), 2022-01-01
Supplement: d2ra05256c1.pdf [file d2ra05256c1.pdf]

## Supplementary Material

### Rational design of mixed Sn-Ge based hybrid halide perovskites for optoelectronic applications: A first principles study

Tridip Chutia <sup>1</sup> and Dhruba Jyoti Kalita <sup>1, a)</sup>

Department of Chemistry, Gauhati University

Electronic mail: dhrubajyoti.kalita@gauhati.ac.in

Table S1: Coordinates of the studied compounds (in Angstroms) optimized by employing PBE functional

#### DMASnI<sub>3</sub>

|    |             |              |              |
|----|-------------|--------------|--------------|
| Sn | 0.088027981 | 4.566108963  | 0.010440241  |
| Sn | 4.368884981 | 4.599020037  | 15.021015759 |
| Sn | 4.368884981 | -0.016455037 | 7.505287759  |
| Sn | 0.088027981 | 9.181584037  | 7.526168241  |
| H  | 5.310495515 | 8.606567146  | 1.292490568  |
| H  | 1.029638515 | 0.558561854  | 13.738965432 |
| H  | 1.029638515 | 4.024003146  | 6.223237432  |
| H  | 5.310495515 | 5.141125854  | 8.808218568  |
| H  | 4.992180271 | 0.297570182  | 2.837027641  |
| H  | 0.711323271 | 8.867558818  | 12.194428359 |
| H  | 0.711323271 | 4.880135182  | 4.678700359  |
| H  | 4.992180271 | 4.284993818  | 10.352755641 |
| H  | 4.744915459 | 7.688422999  | 2.725075825  |
| H  | 0.464058459 | 1.476706001  | 12.306380175 |
| H  | 0.464058459 | 3.105858999  | 4.790652175  |
| H  | 4.744915459 | 6.059270001  | 10.240803825 |
| H  | 4.395345858 | 9.093518954  | 12.320833832 |
| H  | 0.114488858 | 0.071610046  | 2.710622168  |
| H  | 0.114488858 | 4.510953954  | 10.226350168 |
| H  | 4.395345858 | 4.654175046  | 4.805105832  |
| H  | 2.989947036 | 7.964827875  | 12.243007414 |
| H  | 7.270804036 | 1.200301125  | 2.788448586  |
| H  | 7.270804036 | 3.382262875  | 10.304176586 |
| H  | 2.989947036 | 5.782866125  | 4.727279414  |
| H  | 3.361800661 | 8.839980781  | 13.764410190 |
| H  | 7.642657661 | 0.325148219  | 1.267045810  |
| H  | 7.642657661 | 4.257416781  | 8.782773810  |
| H  | 3.361800661 | 4.907712219  | 6.248682190  |
| H  | 2.537615484 | 0.979177238  | 11.209945379 |
| H  | 6.818472484 | 8.185951762  | 3.821510621  |
| H  | 6.818472484 | 5.561741238  | 11.337238621 |

|   |             |             |              |
|---|-------------|-------------|--------------|
| H | 2.537615484 | 3.603387762 | 3.694217379  |
| H | 2.813265221 | 1.759712131 | 12.634826237 |
| H | 7.094122221 | 7.405416869 | 2.396629763  |
| H | 7.094122221 | 6.342277131 | 9.912357763  |
| H | 2.813265221 | 2.822851869 | 5.119098237  |
| C | 5.348897807 | 8.533288683 | 2.383174349  |
| C | 1.068040807 | 0.631840317 | 12.648281651 |
| C | 1.068040807 | 3.950724683 | 5.132553651  |
| C | 5.348897807 | 5.214404317 | 9.898902349  |
| C | 3.377186823 | 8.898642348 | 12.671929449 |
| C | 7.658043823 | 0.266486652 | 2.359526551  |
| C | 7.658043823 | 4.316077348 | 9.875254551  |
| C | 3.377186823 | 4.849051652 | 5.156201449  |
| I | 1.723405085 | 6.616936997 | 1.415821101  |
| I | 6.004262085 | 2.548192003 | 13.615634899 |
| I | 6.004262085 | 2.034371997 | 6.099906899  |
| I | 1.723405085 | 7.130757003 | 8.931549101  |
| I | 2.312647390 | 4.562441458 | 12.631805134 |
| I | 6.593504390 | 4.602687542 | 2.399650866  |
| I | 6.593504390 | 9.145005458 | 9.915378866  |
| I | 2.312647390 | 0.020123542 | 5.116077134  |
| I | 6.926987263 | 6.707779758 | 13.736128867 |
| I | 2.646130263 | 2.457349242 | 1.295327133  |
| I | 2.646130263 | 2.125215758 | 8.811055133  |
| I | 6.926987263 | 7.039913242 | 6.220400867  |
| N | 2.486979145 | 0.848965882 | 12.245514059 |
| N | 6.767836145 | 8.316163118 | 2.785941941  |
| N | 6.767836145 | 5.431529882 | 10.301669941 |
| N | 2.486979145 | 3.733599118 | 4.729786059  |

### DMAGeI<sub>3</sub>

|    |             |             |              |
|----|-------------|-------------|--------------|
| Ge | 0.124100140 | 4.806150278 | -0.096017035 |
| Ge | 4.404957140 | 4.358978722 | 15.127473035 |
| Ge | 4.404957140 | 0.223586278 | 7.611745035  |
| Ge | 0.124100140 | 8.941542722 | 7.419710965  |
| H  | 5.403468385 | 8.466379839 | 1.215362864  |
| H  | 1.122611385 | 0.698749161 | 13.816093136 |
| H  | 1.122611385 | 3.883815839 | 6.300365136  |
| H  | 5.403468385 | 5.281313161 | 8.731090864  |
| H  | 4.955182349 | 0.030383198 | 2.789845723  |
| H  | 0.674325349 | 9.134745802 | 12.241610277 |
| H  | 0.674325349 | 4.612948198 | 4.725882277  |
| H  | 4.955182349 | 4.552180802 | 10.305573723 |
| H  | 5.023020143 | 7.403835558 | 2.605284438  |
| H  | 0.742163143 | 1.761293442 | 12.426171562 |
| H  | 0.742163143 | 2.821271558 | 4.910443562  |
| H  | 5.023020143 | 6.343857442 | 10.121012438 |
| H  | 4.356718474 | 8.746629505 | 12.414128752 |
| H  | 0.075861474 | 0.418499495 | 2.617327248  |
| H  | 0.075861474 | 4.164064505 | 10.133055248 |
| H  | 4.356718474 | 5.001064495 | 4.898400752  |
| H  | 2.830591078 | 7.854484087 | 12.096943208 |
| H  | 7.111448078 | 1.310644913 | 2.934512792  |

|   |             |              |              |
|---|-------------|--------------|--------------|
| H | 7.111448078 | 3.271919087  | 10.450240792 |
| H | 2.830591078 | 5.893209913  | 4.581215208  |
| H | 3.173643362 | 8.473101643  | 13.737926110 |
| H | 7.454500362 | 0.692027357  | 1.293529890  |
| H | 7.454500362 | 3.890537643  | 8.809257890  |
| H | 3.173643362 | 5.274591357  | 6.222198110  |
| H | 2.694206583 | 0.974079122  | 11.306815684 |
| H | 6.975063583 | 8.191049878  | 3.724640316  |
| H | 6.975063583 | 5.556643122  | 11.240368316 |
| H | 2.694206583 | 3.608485878  | 3.791087684  |
| H | 3.130579167 | 1.565754601  | 12.786758678 |
| H | 7.411436167 | 7.599374399  | 2.244697322  |
| H | 7.411436167 | 6.148319601  | 9.760425322  |
| H | 3.130579167 | 3.016809399  | 5.271030678  |
| C | 5.463015676 | 8.358521996  | 2.302113818  |
| C | 1.182158676 | 0.806607004  | 12.729342182 |
| C | 1.182158676 | 3.775957996  | 5.213614182  |
| C | 5.463015676 | 5.389171004  | 9.817841818  |
| C | 3.296348382 | 8.663666333  | 12.667628048 |
| C | 7.577205382 | 0.501462667  | 2.363827952  |
| C | 7.577205382 | 4.081101333  | 9.879555952  |
| C | 3.296348382 | 5.084027667  | 5.151900048  |
| I | 1.446758861 | 6.734138116  | 1.362807520  |
| I | 5.727615861 | 2.430990884  | 13.668648480 |
| I | 5.727615861 | 2.151573116  | 6.152920480  |
| I | 1.446758861 | 7.013555884  | 8.878535520  |
| I | 1.999350739 | 4.673659760  | 12.781739237 |
| I | 6.280207739 | 4.491469240  | 2.249716763  |
| I | 6.280207739 | 9.256223760  | 9.765444763  |
| I | 1.999350739 | -0.091094760 | 5.266011237  |
| I | 6.894204281 | 6.577174308  | 13.641223259 |
| I | 2.613347281 | 2.587954692  | 1.390232741  |
| I | 2.613347281 | 1.994610308  | 8.905960741  |
| I | 6.894204281 | 7.170518692  | 6.125495259  |
| N | 2.618507381 | 0.783207534  | 12.332929568 |
| N | 6.899364381 | 8.381921466  | 2.698526432  |
| N | 6.899364381 | 5.365771534  | 10.214254432 |
| N | 2.618507381 | 3.799357466  | 4.817201568  |

### **DMASn<sub>75</sub>Ge<sub>25</sub>I<sub>3</sub>**

|    |              |              |              |
|----|--------------|--------------|--------------|
| Sn | 3.239069620  | 6.716619961  | 9.314672275  |
| Sn | 3.189038380  | 6.274440039  | 2.762433275  |
| Ge | 9.700336716  | 0.032241636  | 3.924784986  |
| Ge | 9.583987284  | 12.958818364 | 10.477023986 |
| Sn | 9.652792632  | 6.344966785  | 3.861161994  |
| Sn | 9.631531368  | 6.646093215  | 10.413400994 |
| Sn | 3.153509948  | 13.201845448 | 9.331983266  |
| Sn | 3.274598052  | -0.210785448 | 2.779744266  |
| H  | 12.205870944 | 1.930243034  | 5.701003186  |
| H  | 7.078453056  | 11.060816966 | 12.253241186 |
| H  | 5.719363358  | 4.487481107  | 7.527996739  |
| H  | 0.708744642  | 8.503578893  | 0.975758739  |
| H  | 0.417232366  | 11.165439250 | 7.421441448  |

|   |              |              |              |
|---|--------------|--------------|--------------|
| H | 6.010875634  | 1.825620750  | 0.869203448  |
| H | 7.134367161  | 8.486002484  | 5.608349392  |
| H | 12.149956839 | 4.505057516  | 12.160587392 |
| H | 0.694176630  | 2.174772985  | 6.619002378  |
| H | 5.733931370  | 10.816287015 | 0.066764378  |
| H | 7.101702982  | 4.424546908  | 6.631955200  |
| H | 12.182621018 | 8.566513092  | 13.184193200 |
| H | 12.017641623 | 10.829030759 | 6.404443920  |
| H | 7.266682377  | 2.162029241  | 12.956681920 |
| H | 5.758429416  | 8.643060269  | 6.505089288  |
| H | 0.669678584  | 4.347999731  | -0.047148712 |
| H | 0.727243730  | 3.590225742  | 4.711803885  |
| H | 5.700864270  | 9.400834258  | 11.264042885 |
| H | 7.181467016  | 2.841345730  | 8.406858898  |
| H | 12.102856984 | 10.149714270 | 1.854619898  |
| H | 11.959690068 | 9.419802661  | 8.324213375  |
| H | 7.324633932  | 3.571257339  | 1.771974375  |
| H | 5.713144918  | 10.129480625 | 4.656678839  |
| H | 0.714963082  | 2.861579375  | 11.208917839 |
| H | 12.001084251 | 4.275128717  | 5.208655365  |
| H | 7.283239749  | 8.715931283  | 11.760894365 |
| H | 5.674358980  | 2.087929134  | 7.784101386  |
| H | 0.753749020  | 10.903130866 | 1.231862386  |
| H | 0.750897759  | 8.834040453  | 7.923545171  |
| H | 5.677210241  | 4.157019547  | 1.371306171  |
| H | 7.257795174  | 10.855922326 | 5.210312542  |
| H | 12.026528826 | 2.135137674  | 11.762551542 |
| H | 0.604052849  | 4.564426158  | 6.217684741  |
| H | 5.824055151  | 8.426633842  | 12.769922741 |
| H | 7.184273054  | 2.011366526  | 6.814268617  |
| H | 12.100050946 | 10.979693474 | 0.262030617  |
| H | 12.226494928 | 8.457288619  | 6.832385435  |
| H | 7.057829072  | 4.533771381  | 0.280147435  |
| H | 5.769942612  | 11.049171868 | 6.199435171  |
| H | 0.658165388  | 1.941888132  | 12.751673171 |
| H | 10.819189672 | 3.216247104  | 7.199425092  |
| H | 8.465134328  | 9.774812896  | 0.647187092  |
| H | 4.461866906  | 3.258788684  | 5.878286632  |
| H | 1.966241094  | 9.732271316  | 12.430524632 |
| H | 1.985073774  | 9.962321393  | 6.032721494  |
| H | 4.443034226  | 3.028738607  | 12.584959494 |
| H | 8.443280668  | 9.740554123  | 7.185949415  |
| H | 10.841043332 | 3.250505877  | 0.633711415  |
| H | 11.677295996 | 1.891654057  | 8.063915605  |
| H | 7.607028004  | 11.099405943 | 1.511676605  |
| H | 5.245188359  | 4.715275120  | 5.169584158  |
| H | 1.182919641  | 8.275784880  | 11.721823158 |
| H | 1.121667739  | 11.236782091 | 5.103310027  |
| H | 5.306440261  | 1.754277909  | 11.655549027 |
| H | 7.599418104  | 8.370360082  | 7.983662723  |
| H | 11.684905896 | 4.620699918  | 1.431423723  |
| H | 12.273885501 | 3.584051197  | 8.178906984  |
| H | 7.010438499  | 9.407008803  | 1.626667984  |
| H | 5.963748547  | 3.086351268  | 4.912082439  |

|   |              |              |              |
|---|--------------|--------------|--------------|
| H | 0.464359453  | 9.904708732  | 11.464321439 |
| H | 0.629083916  | 9.514910623  | 4.945471062  |
| H | 5.799024084  | 3.476149377  | 11.497710062 |
| H | 6.953788121  | 10.042440241 | 8.141087273  |
| H | 12.330535879 | 2.948619759  | 1.588848273  |
| C | 0.090060061  | 3.855355070  | 5.562515517  |
| C | 6.338047939  | 9.135704930  | 12.114754517 |
| C | 6.593537413  | 2.613555575  | 7.511262088  |
| C | 12.690786587 | 10.377504425 | 0.959023088  |
| C | 12.659973368 | 9.195094231  | 7.513162555  |
| C | 6.624350632  | 3.795965769  | 0.960923555  |
| C | 6.323870983  | 10.385590200 | 5.528823879  |
| C | 0.104237017  | 2.605469800  | 12.081062879 |
| C | 11.790806456 | 2.842581184  | 7.534960621  |
| C | 7.493517544  | 10.148478816 | 0.982722621  |
| C | 5.413191479  | 3.726728388  | 5.608088726  |
| C | 1.014916521  | 9.264331612  | 12.160326726 |
| C | 1.021514259  | 10.279376159 | 5.623294334  |
| C | 5.406593741  | 2.711683841  | 12.175532334 |
| C | 7.472139554  | 9.336256112  | 7.485512103  |
| C | 11.812184446 | 3.654803888  | 0.933274103  |
| I | 2.681146353  | 3.922337239  | 8.717543919  |
| I | 3.746961647  | 9.068722761  | 2.165305919  |
| I | 9.144283728  | 2.691391544  | 4.213174700  |
| I | 10.140040272 | 10.299668456 | 10.765412700 |
| I | 10.142259737 | 9.169401809  | 4.365915159  |
| I | 9.142064263  | 3.821658191  | 10.918153159 |
| I | 3.785757925  | 10.410810723 | 8.836666545  |
| I | 2.642350075  | 2.580249277  | 2.284428545  |
| I | 6.023875980  | 6.027156832  | 9.791467957  |
| I | 0.404232020  | 6.963903168  | 3.239228957  |
| I | 12.356481914 | 0.429846494  | 3.429728281  |
| I | 6.927842086  | 12.561213506 | 9.981967281  |
| I | 6.841088592  | 6.902469655  | 3.361427288  |
| I | 12.443235408 | 6.088590345  | 9.913666288  |
| I | 0.347155480  | 12.569373565 | 9.687480108  |
| I | 6.080952520  | 0.421686435  | 3.135241108  |
| I | 3.632500583  | 7.242604365  | 6.433618725  |
| I | 2.795607417  | 5.748455635  | 12.985857725 |
| I | 9.924672557  | 12.503345765 | 6.609571776  |
| I | 9.359651443  | 0.487714235  | 0.057332776  |
| I | 9.186576919  | 5.839532983  | 6.752487186  |
| I | 10.097747081 | 7.151527017  | 0.200248186  |
| I | 2.820667821  | 0.702139246  | 6.433728843  |
| I | 3.607440179  | 12.288920754 | 12.985967843 |
| N | 12.649085221 | 2.620092468  | 6.339515363  |
| N | 6.635238779  | 10.370967532 | 12.891754363 |
| N | 6.225818930  | 3.892516004  | 6.843546209  |
| N | 0.202289070  | 9.098543996  | 0.291307209  |
| N | 0.066187704  | 10.448366419 | 6.752090048  |
| N | 6.361920296  | 2.542693581  | 0.199851048  |
| N | 6.649926673  | 9.131749245  | 6.262497669  |
| N | 12.634397327 | 3.859310755  | 12.814736669 |

**DMASn<sub>50</sub>Ge<sub>50</sub>I<sub>3</sub>**

|    |              |              |              |
|----|--------------|--------------|--------------|
| Sn | 3.289688433  | 6.748049200  | 9.318412138  |
| Sn | 3.138419567  | 6.243010800  | 2.766173138  |
| Ge | 9.689635822  | 0.063789481  | 3.986102623  |
| Ge | 9.594688178  | 12.927270519 | 10.538341623 |
| Ge | 9.594688178  | 6.559319481  | 3.986102623  |
| Ge | 9.689635822  | 6.431740519  | 10.538341623 |
| Sn | 3.138419567  | 13.243579200 | 9.318412138  |
| Sn | 3.289688433  | -0.252519200 | 2.766173138  |
| H  | 12.124651452 | 2.001245749  | 5.709108571  |
| H  | 7.159672548  | 10.989814251 | 12.261346571 |
| H  | 5.977569505  | 4.641699838  | 7.447436057  |
| H  | 0.450538495  | 8.349360162  | 0.895198057  |
| H  | 0.450538495  | 11.137229838 | 7.447436057  |
| H  | 5.977569505  | 1.853830162  | 0.895198057  |
| H  | 7.159672548  | 8.496775749  | 5.709108571  |
| H  | 12.124651452 | 4.494284251  | 12.261346571 |
| H  | 0.653024692  | 2.185951113  | 6.588379669  |
| H  | 5.775083308  | 10.805108887 | 0.036141669  |
| H  | 7.255955791  | 4.434328291  | 6.429080990  |
| H  | 12.028368209 | 8.556731709  | 12.981318990 |
| H  | 12.028368209 | 10.929858291 | 6.429080990  |
| H  | 7.255955791  | 2.061201709  | 12.981318990 |
| H  | 5.775083308  | 8.681481113  | 6.588379669  |
| H  | 0.653024692  | 4.309578887  | 0.036141669  |
| H  | 0.703154405  | 3.581885799  | 4.669465958  |
| H  | 5.724953595  | 9.409174201  | 11.221704958 |
| H  | 7.402241507  | 2.973121233  | 8.310761621  |
| H  | 11.882082493 | 10.017938767 | 1.758522621  |
| H  | 11.882082493 | 9.468651233  | 8.310761621  |
| H  | 7.402241507  | 3.522408767  | 1.758522621  |
| H  | 5.724953595  | 10.077415799 | 4.669465958  |
| H  | 0.703154405  | 2.913644201  | 11.221704958 |
| H  | 12.032522684 | 4.357484901  | 5.205928322  |
| H  | 7.251801316  | 8.633575099  | 11.758167322 |
| H  | 5.815733659  | 2.268186274  | 7.863234808  |
| H  | 0.612374341  | 10.722873726 | 1.310995808  |
| H  | 0.612374341  | 8.763716274  | 7.863234808  |
| H  | 5.815733659  | 4.227343726  | 1.310995808  |
| H  | 7.251801316  | 10.853014901 | 5.205928322  |
| H  | 12.032522684 | 2.138045099  | 11.758167322 |
| H  | 0.676782231  | 4.569694327  | 6.172290784  |
| H  | 5.751325769  | 8.421365673  | 12.724528784 |
| H  | 7.239512939  | 2.038204483  | 6.788368268  |
| H  | 12.044811061 | 10.952855517 | 0.236130268  |
| H  | 12.044811061 | 8.533734483  | 6.788368268  |
| H  | 7.239512939  | 4.457325517  | 0.236130268  |
| H  | 5.751325769  | 11.065224327 | 6.172290784  |
| H  | 0.676782231  | 1.925835673  | 12.724528784 |
| H  | 10.841572161 | 3.351434621  | 7.232386289  |
| H  | 8.442751839  | 9.639625379  | 0.680148289  |
| H  | 4.507432223  | 3.358648757  | 6.017763614  |
| H  | 1.920675777  | 9.632411243  | 12.570001614 |

|   |              |              |              |
|---|--------------|--------------|--------------|
| H | 1.920675777  | 9.854178757  | 6.017763614  |
| H | 4.507432223  | 3.136881243  | 12.570001614 |
| H | 8.442751839  | 9.846964621  | 7.232386289  |
| H | 10.841572161 | 3.144095379  | 0.680148289  |
| H | 11.671051275 | 2.008785078  | 8.089873260  |
| H | 7.613272725  | 10.982274922 | 1.537634260  |
| H | 5.259534312  | 4.734005016  | 5.141096961  |
| H | 1.168573688  | 8.257054984  | 11.693335961 |
| H | 1.168573688  | 11.229535016 | 5.141096961  |
| H | 5.259534312  | 1.761524984  | 11.693335961 |
| H | 7.613272725  | 8.504315078  | 8.089873260  |
| H | 11.671051275 | 4.486744922  | 1.537634260  |
| H | 12.337349798 | 3.676220805  | 8.163345594  |
| H | 6.946974202  | 9.314839195  | 1.611106594  |
| H | 5.889237948  | 3.065851971  | 4.912403530  |
| H | 0.538870052  | 9.925208029  | 11.464642530 |
| H | 0.538870052  | 9.561381971  | 4.912403530  |
| H | 5.889237948  | 3.429678029  | 11.464642530 |
| H | 6.946974202  | 10.171750805 | 8.163345594  |
| H | 12.337349798 | 2.819309195  | 1.611106594  |
| C | 0.105840451  | 3.886575805  | 5.535464593  |
| C | 6.322267549  | 9.104484195  | 12.087703593 |
| C | 6.735609084  | 2.719383247  | 7.480592036  |
| C | 12.548714916 | 10.271676753 | 0.928353036  |
| C | 12.548714916 | 9.214913247  | 7.480592036  |
| C | 6.735609084  | 3.776146753  | 0.928353036  |
| C | 6.322267549  | 10.382105805 | 5.535464593  |
| C | 0.105840451  | 2.608954195  | 12.087703593 |
| C | 11.808257899 | 2.945948866  | 7.543539849  |
| C | 7.476066101  | 10.045111134 | 0.991301849  |
| C | 5.440756036  | 3.768736349  | 5.621734019  |
| C | 0.987351964  | 9.222323651  | 12.173972019 |
| C | 0.987351964  | 10.264266349 | 5.621734019  |
| C | 5.440756036  | 2.726793651  | 12.173972019 |
| C | 7.476066101  | 9.441478866  | 7.543539849  |
| C | 11.808257899 | 3.549581134  | 0.991301849  |
| I | 2.645418922  | 3.972958327  | 8.774141622  |
| I | 3.782689078  | 9.018101673  | 2.221903622  |
| I | 9.199628104  | 2.740444353  | 4.217965177  |
| I | 10.084695896 | 10.250615647 | 10.770203177 |
| I | 10.084695896 | 9.235974353  | 4.217965177  |
| I | 9.199628104  | 3.755085647  | 10.770203177 |
| I | 3.782689078  | 10.468488327 | 8.774141622  |
| I | 2.645418922  | 2.522571673  | 2.221903622  |
| I | 6.089292383  | 6.073078542  | 9.690925689  |
| I | 0.338815617  | 6.917981458  | 3.138686689  |
| I | 12.354632391 | 0.359640574  | 3.464524263  |
| I | 6.929691609  | 12.631419426 | 10.016763263 |
| I | 6.929691609  | 6.855170574  | 3.464524263  |
| I | 12.354632391 | 6.135889426  | 10.016763263 |
| I | 0.338815617  | 12.568608542 | 9.690925689  |
| I | 6.089292383  | 0.422451458  | 3.138686689  |
| I | 3.615446809  | 7.279489339  | 6.427810164  |
| I | 2.812661191  | 5.711570661  | 12.980049164 |

|   |              |              |              |
|---|--------------|--------------|--------------|
| I | 9.945954796  | 12.566852285 | 6.680173838  |
| I | 9.338369204  | 0.424207715  | 0.127934838  |
| I | 9.338369204  | 6.071322285  | 6.680173838  |
| I | 9.945954796  | 6.919737715  | 0.127934838  |
| I | 2.812661191  | 0.783959339  | 6.427810164  |
| I | 3.615446809  | 12.207100661 | 12.980049164 |
| N | 12.621837391 | 2.671606967  | 6.327554599  |
| N | 6.662486609  | 10.319453033 | 12.879793599 |
| N | 6.381057499  | 3.972642294  | 6.757290094  |
| N | 0.047050501  | 9.018417706  | 0.205051093  |
| N | 0.047050501  | 10.468172294 | 6.757290094  |
| N | 6.381057499  | 2.522887706  | 0.205051093  |
| N | 6.662486609  | 9.167136967  | 6.327554599  |
| N | 12.621837391 | 3.823923033  | 12.879793599 |

### DMASn<sub>25</sub>Ge<sub>75</sub>I<sub>3</sub>

|    |              |              |              |
|----|--------------|--------------|--------------|
| Ge | 3.395717927  | 6.536290634  | 9.239056998  |
| Ge | 3.032390073  | 6.454769366  | 2.686817998  |
| Ge | 9.696055626  | -0.003955493 | 4.019453707  |
| Ge | 9.588268374  | 12.995015493 | 10.571692707 |
| Ge | 9.588835517  | 6.616263391  | 3.950366974  |
| Ge | 9.695488483  | 6.374796609  | 10.502605974 |
| Sn | 3.183554872  | 13.213490650 | 9.251701873  |
| Sn | 3.244553128  | -0.222430650 | 2.699462873  |
| H  | 12.065349244 | 2.074232082  | 5.641183373  |
| H  | 7.218974756  | 10.916827918 | 12.193421373 |
| H  | 6.035346959  | 4.643046847  | 7.342729048  |
| H  | 0.392761041  | 8.348013153  | 0.790491048  |
| H  | 0.488741807  | 11.070695602 | 7.487599450  |
| H  | 5.939366193  | 1.920364398  | 0.935361450  |
| H  | 6.884909009  | 8.407645275  | 5.774829109  |
| H  | 12.399414991 | 4.583414725  | 12.327067109 |
| H  | 0.630468514  | 2.125980951  | 6.478946228  |
| H  | 5.797639486  | 10.865079049 | -0.073291772 |
| H  | 7.296191315  | 4.342882360  | 6.326615322  |
| H  | 11.988132685 | 8.648177640  | 12.878853322 |
| H  | 12.052746319 | 10.905953496 | 6.483512431  |
| H  | 7.231577681  | 2.085106504  | 13.035750431 |
| H  | 5.610633632  | 8.768764768  | 6.758170449  |
| H  | 0.817474368  | 4.222295232  | 0.205932449  |
| H  | 0.696298744  | 3.634331810  | 4.639717219  |
| H  | 5.731809256  | 9.356728190  | 11.191956219 |
| H  | 7.395019551  | 2.952849670  | 8.270148564  |
| H  | 11.889304449 | 10.038210330 | 1.717909564  |
| H  | 11.881167375 | 9.424156637  | 8.341475636  |
| H  | 7.403156625  | 3.566903363  | 1.789236636  |
| H  | 5.549285612  | 10.095532740 | 4.784951947  |
| H  | 0.878822388  | 2.895527260  | 11.337190947 |
| H  | 12.091234940 | 4.458012914  | 5.289274272  |
| H  | 7.193089060  | 8.533047086  | 11.841513272 |
| H  | 5.777639123  | 2.300095868  | 7.850666557  |
| H  | 0.650468877  | 10.690964132 | 1.298427557  |
| H  | 0.593594367  | 8.684461327  | 7.874156546  |



|   |              |              |              |
|---|--------------|--------------|--------------|
| H | 5.834513633  | 4.306598673  | 1.321917546  |
| H | 7.187971846  | 10.716985502 | 5.170708447  |
| H | 12.096352154 | 2.274074498  | 11.722947447 |
| H | 0.783856218  | 4.525726146  | 6.197033115  |
| H | 5.644251782  | 8.465333854  | 12.749271115 |
| H | 7.186325817  | 1.971633489  | 6.780529925  |
| H | 12.097998183 | 11.019426511 | 0.228291925  |
| H | 12.014188929 | 8.508514204  | 6.805788131  |
| H | 7.270135071  | 4.482545796  | 0.253550131  |
| H | 5.796301301  | 11.124774158 | 6.236900143  |
| H | 0.631806699  | 1.866285842  | 12.789138143 |
| H | 10.920881232 | 3.425202419  | 7.277132096  |
| H | 8.363442768  | 9.565857581  | 0.724894096  |
| H | 4.512615995  | 3.346516323  | 5.969840088  |
| H | 1.915492005  | 9.644543677  | 12.522078088 |
| H | 1.911705403  | 9.763643037  | 6.024457338  |
| H | 4.516402597  | 3.227416963  | 12.576695338 |
| H | 8.415399119  | 9.692763988  | 7.133998938  |
| H | 10.868924881 | 3.298296012  | 0.581760938  |
| H | 11.657862036 | 1.960496449  | 8.012985292  |
| H | 7.626461964  | 11.030563551 | 1.460746292  |
| H | 5.295017504  | 4.680260797  | 5.048630777  |
| H | 1.133090496  | 8.310799203  | 11.600869777 |
| H | 1.192158759  | 11.177098854 | 5.183258920  |
| H | 5.235949241  | 1.813961146  | 11.735497920 |
| H | 7.553419963  | 8.452489156  | 8.107910587  |
| H | 11.730904037 | 4.538570844  | 1.555671587  |
| H | 12.459669308 | 3.563336555  | 8.187204184  |
| H | 6.824654692  | 9.427723445  | 1.634965184  |
| H | 5.879053652  | 2.989658469  | 4.866202475  |
| H | 0.549054348  | 10.001401531 | 11.418441475 |
| H | 0.503647954  | 9.534760171  | 4.932437782  |
| H | 5.924460046  | 3.456299829  | 11.484676782 |
| H | 7.038343366  | 10.172497991 | 8.176385409  |
| H | 12.245980634 | 2.818562009  | 1.624146409  |
| C | 0.148896745  | 3.915765507  | 5.546225728  |
| C | 6.279211255  | 9.075294493  | 12.098464728 |
| C | 6.715097559  | 2.696108080  | 7.450788451  |
| C | 12.569226441 | 10.294951920 | 0.898549451  |
| C | 12.539471383 | 9.165411744  | 7.505707530  |
| C | 6.744852617  | 3.825648256  | 0.953468530  |
| C | 6.241778356  | 10.363827593 | 5.589560901  |
| C | 0.186329644  | 2.627232407  | 12.141799901 |
| C | 11.858483437 | 2.923105400  | 7.533663098  |
| C | 7.425840563  | 10.067954600 | 0.981425098  |
| C | 5.452156513  | 3.724196931  | 5.556224685  |
| C | 0.975951487  | 9.266863069  | 12.108462685 |
| C | 0.986146031  | 10.208317650 | 5.647260111  |
| C | 5.441961969  | 2.782742350  | 12.199498111 |
| C | 7.449291376  | 9.381723529  | 7.540851471  |
| C | 11.835032624 | 3.609336471  | 0.988613471  |
| I | 2.725212144  | 3.915773687  | 8.980151204  |
| I | 3.702895856  | 9.075286313  | 2.427913204  |
| I | 9.201323691  | 2.675843871  | 4.270936889  |

|   |              |              |              |
|---|--------------|--------------|--------------|
| I | 10.083000309 | 10.315216129 | 10.823174889 |
| I | 10.103040066 | 9.282199694  | 4.178032916  |
| I | 9.181283934  | 3.708860306  | 10.730270916 |
| I | 3.761958308  | 10.418260823 | 8.723643029  |
| I | 2.666149692  | 2.572799177  | 2.171405029  |
| I | 6.070188361  | 6.075341422  | 9.593008695  |
| I | 0.357919639  | 6.915718578  | 3.040769695  |
| I | 12.353227220 | 0.326368895  | 3.453712646  |
| I | 6.931096780  | 12.664691105 | 10.005951646 |
| I | 6.905829247  | 6.899063321  | 3.545247531  |
| I | 12.378494753 | 6.091996679  | 10.097486531 |
| I | 0.372813389  | 12.615061739 | 9.670808841  |
| I | 6.055294611  | 0.375998261  | 3.118569841  |
| I | 3.496122634  | 7.088141969  | 6.556103485  |
| I | 2.931985366  | 5.902918031  | 13.108342485 |
| I | 9.958096279  | 12.503957612 | 6.713290369  |
| I | 9.326227721  | 0.487102388  | 0.161051369  |
| I | 9.417713248  | 6.056908063  | 6.636375304  |
| I | 9.866610752  | 6.934151937  | 0.084136304  |
| I | 2.797583626  | 0.786613669  | 6.367443120  |
| I | 3.630524374  | 12.204446331 | 12.919682120 |
| N | 12.620505370 | 2.676587395  | 6.278133980  |
| N | 6.663818630  | 10.314472605 | 12.830372980 |
| N | 6.407577747  | 3.933085637  | 6.678847890  |
| N | 0.020530253  | 9.057974363  | 0.126608890  |
| N | 0.063574767  | 10.418595528 | 6.796208549  |
| N | 6.364533233  | 2.572464472  | 0.243969549  |
| N | 6.514063596  | 9.147888321  | 6.406124224  |
| N | 12.770260404 | 3.843171679  | 12.958363224 |

**Table S2: Validation of the reference compound (DMAPbI<sub>3</sub>) with different functionals**

| Functionals | VBM (eV) | CBM (eV) | Band Gap (eV) |
|-------------|----------|----------|---------------|
| PBE         | 1.3008   | 3.9241   | 2.62          |
| PBEsol      | 1.1812   | 4.4717   | 3.29          |
| PBE0        | 0.4716   | 5.2422   | 4.77          |
| HSE06       | 0.8454   | 4.9010   | 4.05          |

**Table S3: Calculated lattice parameters of the studied OIHPs in Å.**

| Compounds                                               | Theoretical |       |       | Experimental |      |       |
|---------------------------------------------------------|-------------|-------|-------|--------------|------|-------|
|                                                         | a           | b     | c     | a            | b    | c     |
| DMASnI <sub>3</sub>                                     | 8.56        | 9.17  | 15.00 | 8.28         | 8.78 | 14.63 |
| DMAGeI <sub>3</sub>                                     | 8.56        | 9.16  | 15.03 |              |      |       |
| DMASn <sub>0.75</sub> Ge <sub>0.25</sub> I <sub>3</sub> | 12.86       | 12.99 | 13.10 |              |      |       |
| DMASn <sub>0.50</sub> Ge <sub>0.50</sub> I <sub>3</sub> | 12.86       | 12.99 | 13.10 |              |      |       |
| DMASn <sub>0.25</sub> Ge <sub>0.75</sub> I <sub>3</sub> | 12.86       | 12.99 | 13.10 |              |      |       |
